# Supplementary material for: Immortal polymerization of LA: the influence of steric effects, electronic effects and pKaon chain transfer agents
Source: Royal Society of Chemistry journal article supplement (doi:10.1039/d2py00081d), 2022-01-01
Supplement: d2py00081d1.pdf [file d2py00081d1.pdf]

## Supporting Information

# Immortal Polymerization of LA: the Influence of Steric Effect, Electron Effect and $pK_a$ for Chain Transfer Agents

Na Liu, Jince Zhang, Jingyi Wen, Xiaolei You and Dawei Fang\*

*Institute of Rare and Scattered Elements, College of Chemistry, Liaoning University, Shenyang 110036, PR China.*

\*Corresponding author. E-mail: dwfang@lnu.edu.cn. Fax: +86 24 62202380; Tel: +86 24 62202380.

**Fig. S1** 10 equiv. of PhOH and  $\text{Ca}[\text{N}(\text{SiMe}_3)_2]_2(\text{THF})_2$  reacted at room temperature: 1) for 30 min; 2) for 1 h; 3) for 1.5 h.

**Fig. S2** 10 equiv. of *p*-CH<sub>3</sub>-PhOH and  $\text{Ca}[\text{N}(\text{SiMe}_3)_2]_2(\text{THF})_2$  reacted at room temperature: 1) for 30 min; 2) for 1 h; 3) for 1.5 h.

**Fig. S3** 10 equiv. of PhCH<sub>2</sub>NH<sub>2</sub> and  $\text{Ca}[\text{N}(\text{SiMe}_3)_2]_2(\text{THF})_2$  reacted at room temperature: 1) for 30 min; 2) for 1 h; 3) for 1.5 h.

**Fig. S4** <sup>1</sup>H NMR (400 MHz, CDCl<sub>3</sub>, 25 °C) spectrum of the afforded PLLA sample ( $M_{n,\text{GPC}} = 3400/1900$  g/mol,  $M_w/M_n = 1.06/1.11$ ) prepared by  $\text{Ca}[\text{N}(\text{SiMe}_3)_2]_2(\text{THF})_2/p\text{-CH}_3\text{-PhOH}$ .

**Fig. S5** MALDI-TOF mass spectrum (Na<sup>+</sup>) of a PLLA sample ( $M_{n,\text{GPC}} = 3400/1900$  g/mol,  $M_w/M_n = 1.06/1.11$ ) prepared by the binary catalyst  $\text{Ca}[\text{N}(\text{SiMe}_3)_2]_2(\text{THF})_2/p\text{-CH}_3\text{-PhOH}$ .

**Fig. S6** Semilogarithmic plots of  $\ln([\text{LA}]_0/[\text{LA}]_t)$  for the ROP of L-LA versus time initiated by different  $\text{Ca}[\text{N}(\text{SiMe}_3)_2]_2(\text{THF})_2/\text{Ph}_2\text{CHOH}$  ratios.

**Fig. S7**. Semilogarithmic plots of  $\ln([\text{LA}]_0/[\text{LA}]_t)$  for the ROP of L-LA versus time initiated by different  $\text{Ca}[\text{N}(\text{SiMe}_3)_2]_2(\text{THF})_2/\text{Ph}_2\text{CHOH}$  ratios.

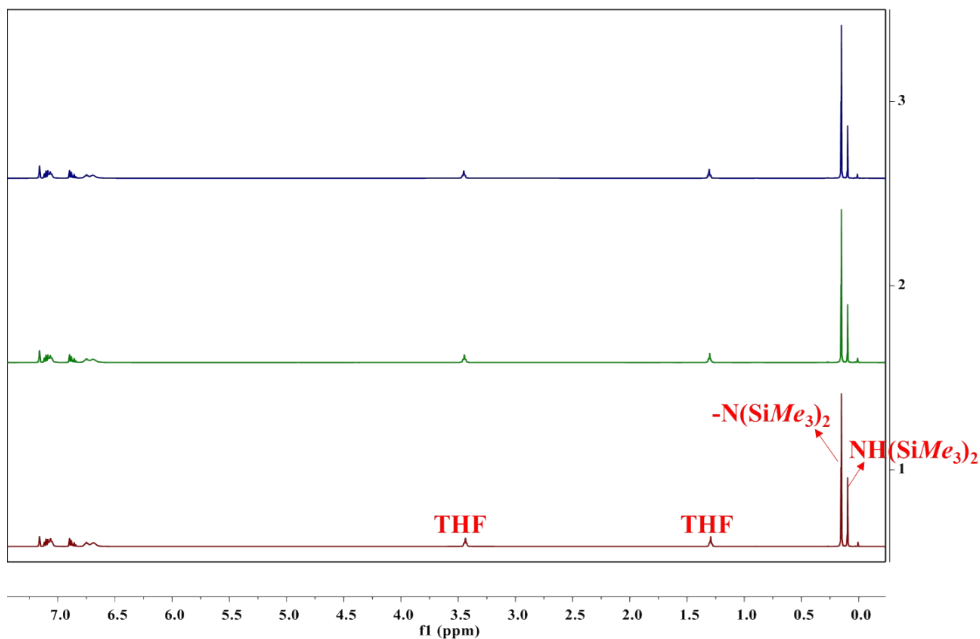

**Fig. S1** 10 equiv. of PhOH and  $\text{Ca}[\text{N}(\text{SiMe}_3)_2]_2(\text{THF})_2$  reacted at room temperature: 1) for 30 min; 2) for 1 h; 3) for 1.5 h.

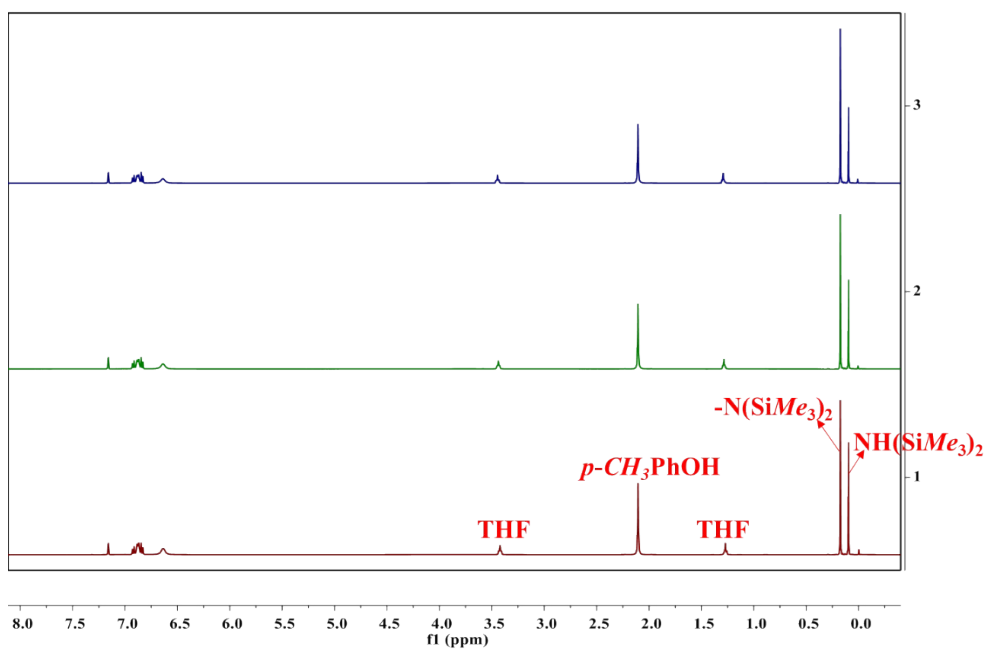

**Fig. S2** 10 equiv. of *p*-CH<sub>3</sub>-PhOH and  $\text{Ca}[\text{N}(\text{SiMe}_3)_2]_2(\text{THF})_2$  reacted at room temperature: 1) for 30 min; 2) for 1 h; 3) for 1.5 h.

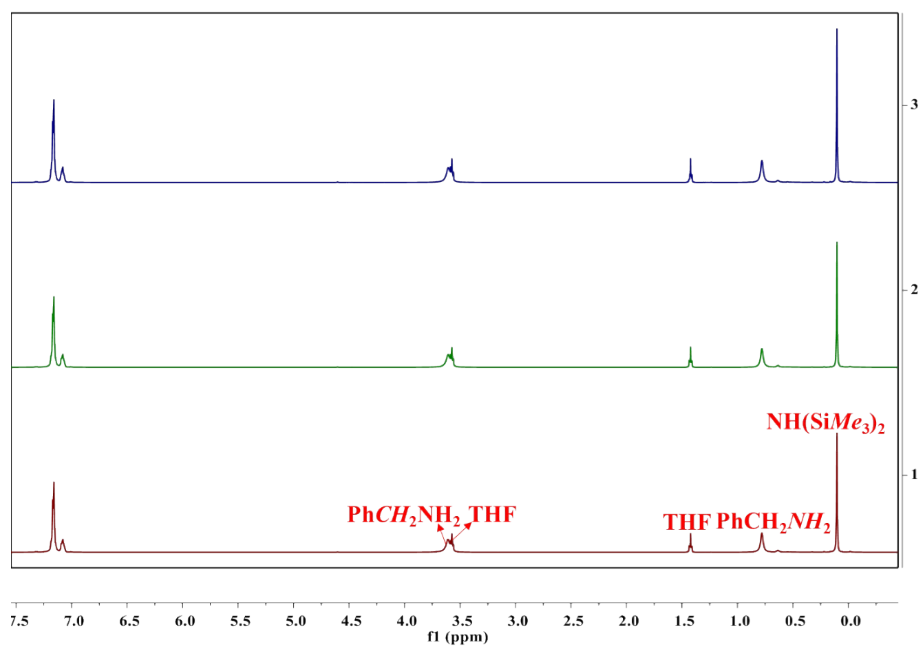

**Fig. S3** 10 equiv. of  $\text{PhCH}_2\text{NH}_2$  and  $\text{Ca}[\text{N}(\text{SiMe}_3)_2]_2(\text{THF})_2$  reacted at room temperature: 1) for 30 min; 2) for 1 h; 3) for 1.5 h.

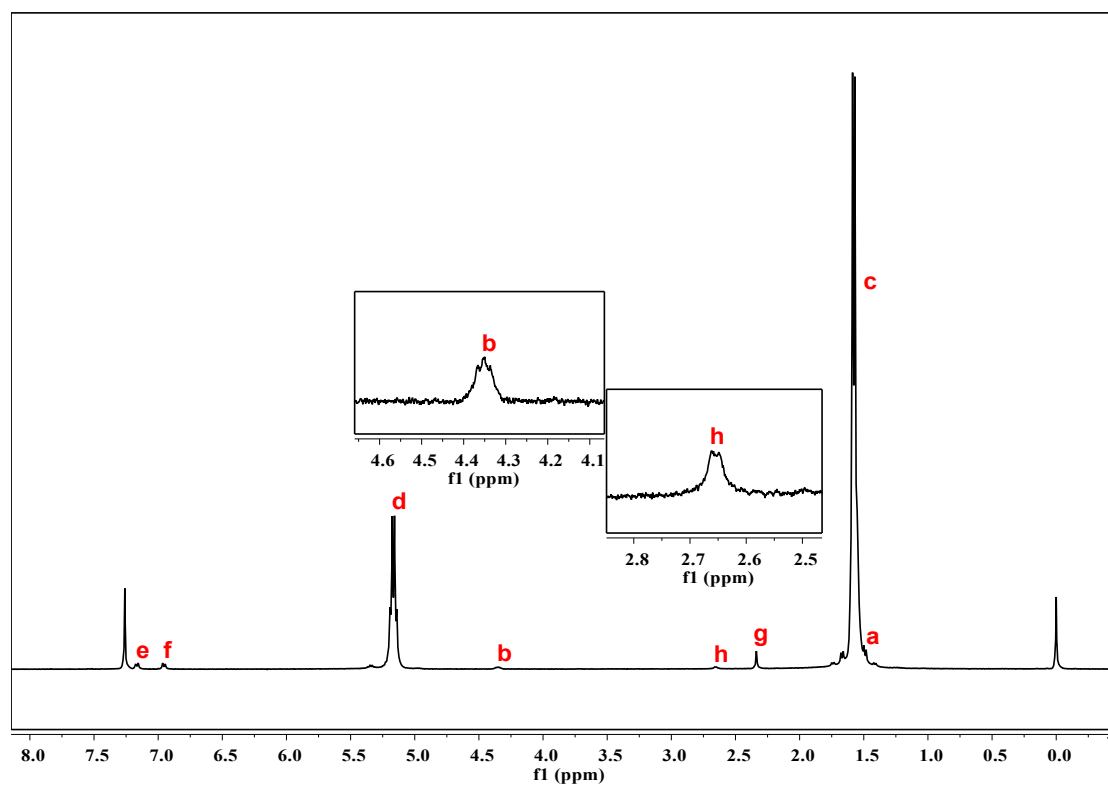

**Fig. S4**  $^1\text{H}$  NMR (400 MHz,  $\text{CDCl}_3$ , 25  $^\circ\text{C}$ ) spectrum of the afforded PLLA sample ( $M_{n,\text{GPC}} = 3400/1900$  g/mol,  $M_w/M_n = 1.06/1.11$ ) prepared by  $\text{Ca}[\text{N}(\text{SiMe}_3)_2]_2(\text{THF})_2/p\text{-CH}_3\text{-PhOH}$ .

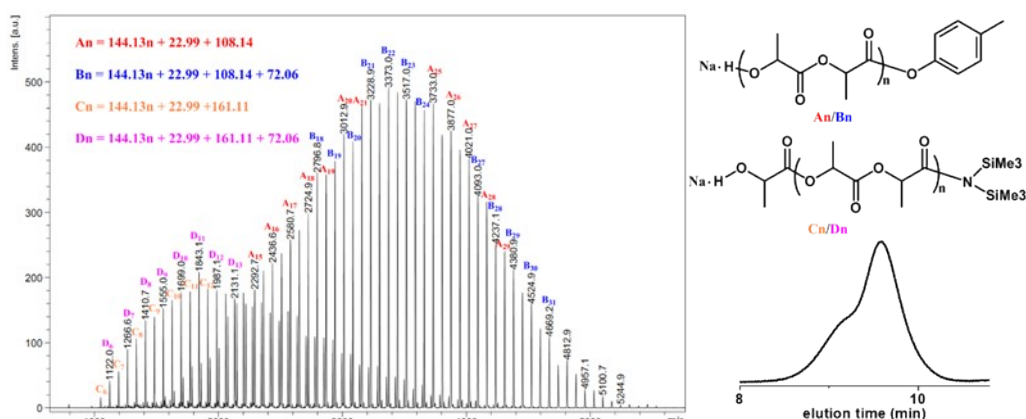

**Fig. S5** MALDI-TOF mass spectrum ( $\text{Na}^+$ ) of a PLLA sample ( $M_{n,\text{GPC}} = 3400/1900$  g/mol,  $M_w/M_n = 1.06/1.11$ ) prepared by the binary catalyst  $\text{Ca}[\text{N}(\text{SiMe}_3)_2]_2(\text{THF})_2/p\text{-CH}_3\text{-PhOH}$  ( $A_n = 144.13n + 22.99 + 108.14$ ,  $B_n = 144.13n + 22.99 + 108.14 + 72.06$ ,  $C_n = 144.13n + 22.99 + 161.11$ ,  $D_n = 144.13n + 22.99 + 161.11 + 72.06$ , where  $n$  is the degree of polymerization,  $M_{\text{Na}} = 22.99$  g/mol,  $M_{\text{LA}} = 144.13$  g/mol,  $M_{\text{NH}(\text{SiMe}_3)_2} = 161.11$  g/mol and  $M_{p\text{-CH}_3\text{-PhOH}} = 108.14$  g/mol).

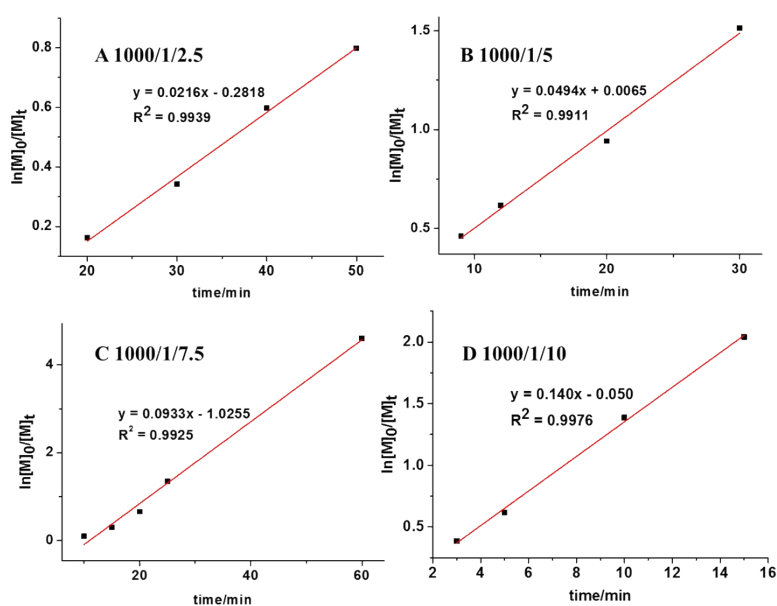

**Fig. S6** Semilogarithmic plots of  $\ln([\text{LA}]_0/[\text{LA}]_t)$  for the ROP of L-LA versus time initiated by different  $\text{Ca}[\text{N}(\text{SiMe}_3)_2]_2(\text{THF})_2/\text{Ph}_2\text{CHOH}$  ratios: A) **1000/1/2.5**,  $k_{\text{app}} = 2.16 \times 10^{-2} \text{ min}^{-1}$ ,  $R^2 = 0.9772$ ; B) **1000/1/5**,  $k_{\text{app}} = 4.94 \times 10^{-2} \text{ min}^{-1}$ ,  $R^2 = 0.9984$ ; C) **1000/1/7.5**,  $k_{\text{app}} = 9.33 \times 10^{-2} \text{ min}^{-1}$ ,  $R^2 = 0.9844$ ; D) **1000/1/10**,  $k_{\text{app}} = 1.40 \times 10^{-1} \text{ min}^{-1}$ ,  $R^2 = 0.9947$  (Conditions:  $T = 50$  °C, in toluene,  $[\text{LA}]_0 = 2.0$  M).

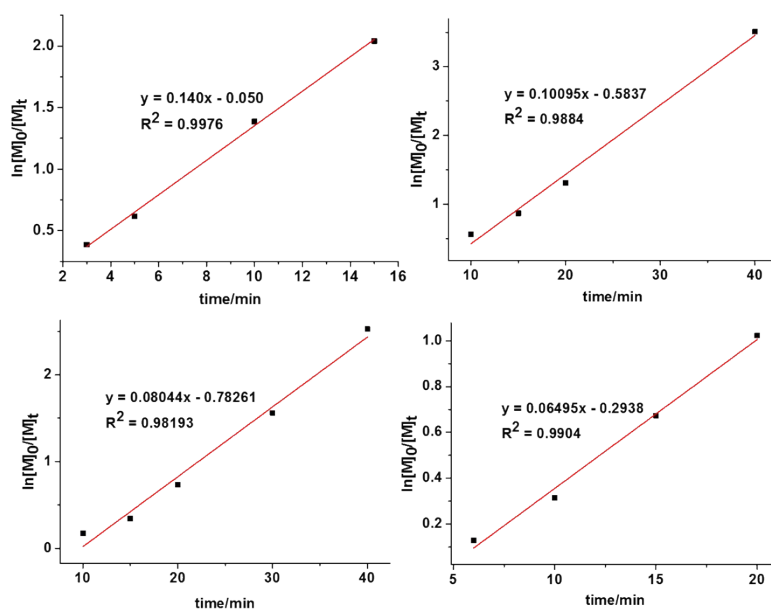

**Fig. S7** Semilogarithmic plots of  $\ln([LA]_0/[LA]_t)$  for the ROP of L-LA versus time initiated by different  $\text{Ca}[\text{N}(\text{SiMe}_3)_2](\text{THF})_2/\text{Ph}_2\text{CHOH}$  ratios: A) **1000/1/10**,  $k_{\text{app}} = 1.40 \times 10^{-1} \text{ min}^{-1}$ ,  $R^2 = 0.9772$ ; B) **1000/1/15**,  $k_{\text{app}} = 1.01 \times 10^{-1} \text{ min}^{-1}$ ,  $R^2 = 0.9984$ ; C) **1000/1/30**,  $k_{\text{app}} = 8.04 \times 10^{-2} \text{ min}^{-1}$ ,  $R^2 = 0.9844$ ; D) **1000/1/40**,  $k_{\text{app}} = 6.50 \times 10^{-1} \text{ min}^{-1}$ ,  $R^2 = 0.9947$  (Conditions:  $T = 50 \text{ }^\circ\text{C}$ , in toluene,  $[LA]_0 = 2.0 \text{ M}$ ).
